# Supplementary material for: Potential of in vivo real-time gastric gas profiling: a pilot evaluation of heat-stress and modulating dietary cinnamon effect in an animal model
Source: PubMed Central journal article supplement (PMC5025890; doi:10.1038/srep33387), 2016-09-16
Supplement: srep33387-s1.pdf [file srep33387-s1.pdf]

## Supplementary Information

### **Potential of *in vivo* real-time gastric gas profiling: a pilot evaluation of heat-stress and modulating dietary cinnamon effect in an animal model**

Jian Zhen Ou<sup>1</sup>, Jeremy J Cottrell<sup>2</sup>, Nam Ha<sup>1</sup>, Naresh Pillai<sup>1</sup>, Chu K Yao<sup>3</sup>, Kyle J Berean<sup>1</sup>, Stephanie A Ward<sup>4</sup>, Danilla Grando<sup>5</sup>, Jane G Muir<sup>3</sup>, Christopher J. Harrison<sup>1</sup>, Udani Wijesiriwardana<sup>2</sup>, Frank R Dunshea<sup>2\*</sup>, Peter R Gibson<sup>3\*</sup> and Kourosh Kalantar-zadeh<sup>1\*</sup>

<sup>1</sup>School of Engineering, RMIT University, Melbourne, Australia

<sup>2</sup>Faculty of Veterinary and Agricultural Sciences, The University of Melbourne, Parkville, Australia

<sup>3</sup>Department of Gastroenterology, The Alfred Hospital, Monash University, Melbourne, Australia

<sup>4</sup>Monash Ageing Research Centre, Monash University, Melbourne, Australia

<sup>5</sup>School of Science, RMIT University, Bundoora, Australia

### **Supplementary Information Note 1: Selectivity of the gas sensor**

The selectivity of the gas sensor is evaluated under the exposure to different gases listed in the introduction, including CO<sub>2</sub>, H<sub>2</sub>, CH<sub>4</sub>, H<sub>2</sub>S and NO. According to the post-mortem pig study by Jensen and Jorgensen <sup>1</sup>, the concentration of CO<sub>2</sub> as the major gas in the stomach varies from ~12 to ~50% in response to a normal diet, while there is a small amount of H<sub>2</sub> ranged between ~0.5% and ~1%. In addition, no CH<sub>4</sub> gas is detected in the stomach and there is no known literature on the presence of other gases such as H<sub>2</sub>S and NO in the stomach of pigs. Therefore, for the selectivity assessments for our sensor, the concentrations for CO<sub>2</sub> and H<sub>2</sub> are chosen similar to those presented by Jensen and Jorgensen. For CH<sub>4</sub>, H<sub>2</sub>S and NO, the concentrations are selected as 6%, 56 ppm and 10 ppm, respectively. These concentrations reach either the combustion lower limit (CH<sub>4</sub>) or the immediately dangerous to life or health (IDLH) values (H<sub>2</sub>S and NO). The influence of humidity on the gas sensor response is also investigated. Two relative humidity (R. H.) levels are chosen, in which one is at ~30% that represents the ambient condition and the other is ~100% that reflects the actual gut environment closely.

From Figure S1, it is observed that only CO<sub>2</sub> gas causes the increase of sensor output voltage while the responses for humidity, H<sub>2</sub> and CH<sub>4</sub> are opposite. There is no obvious response toward both H<sub>2</sub>S and NO. In addition, the response magnitude for CO<sub>2</sub> is much larger (up to 0.06 V) compared to H<sub>2</sub> (up to 0.015 V), CH<sub>4</sub> (up to 0.01 V) and humidity (up to 0.005 V), which indicates high selectivity of this gas sensor in the pig stomach environment. Therefore, it can be concluded that the sensor responses shown in Figure 2 are the result of the change of gastric CO<sub>2</sub> concentration in response to diet and stress.

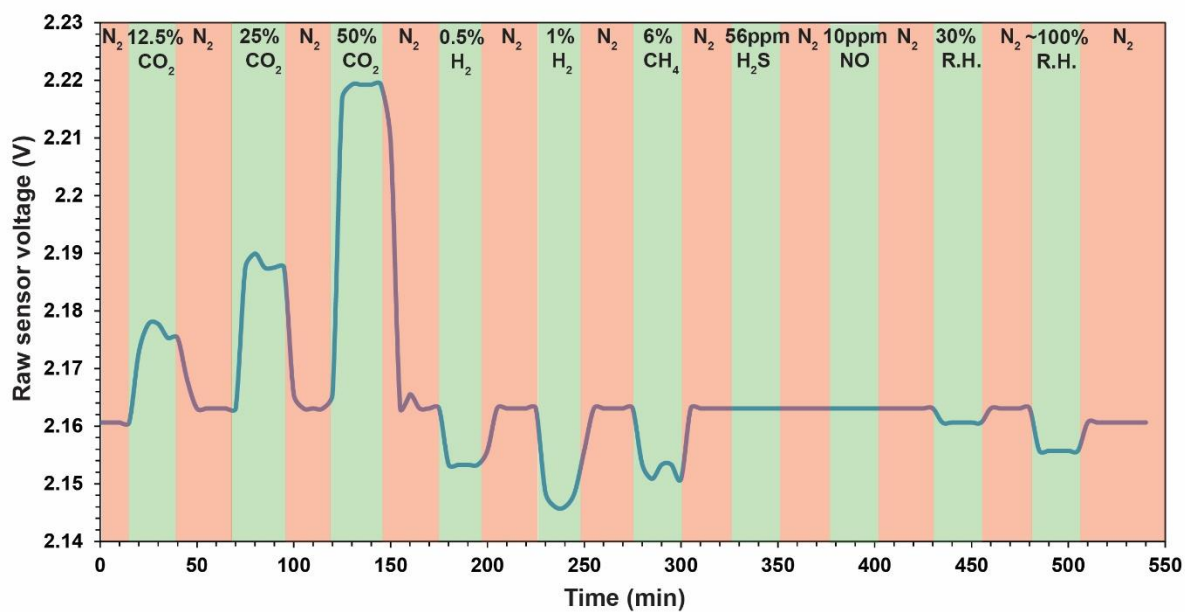

**Figure S1.** Selectivity measurement of the gas sensor of the gastric gas profiler in the presence of CO<sub>2</sub> (12.5-50%), H<sub>2</sub> (0.5-1%), CH<sub>4</sub> (6%), H<sub>2</sub>S (56 ppm), NO (10 ppm) and humidity (30% and ~100% R. H.) in dry N<sub>2</sub> balance.

## **Supplementary Information Note 2: Accuracy of the temperature sensor**

The accuracy of the temperature sensor is investigated by placing the gastric gas profiler in an environmental chamber at a temperature range between 38°C and 42°C, which simulates the gastric temperature variation in response to diet and stress (Figure 2). By comparing the sensor digital reading with the actual chamber temperature, the temperature sensor has a high accuracy with the noise level of only up to 0.2°C as shown in Figure S2, which is similar to that of the chamber temperature controller (0.2°C accuracy). The rise of temperature corresponding to feeding without cinnamon in the thermoneutral condition is between 0.6°C and 0.8°C (Figure 2A) which is well above the noise level of the temperature sensor, confirming that the heat production is due to metabolic and chemical activities. In comparison, the temperature variation corresponding to the feeding with cinnamon is between ~0.2 and ~0.4°C (Figure 2B), which is just above the noise floor. This means that the noise analysis for the temperature profile confirms the conclusion that the addition of cinnamon in the diet possibly reduces the heat production due to the inhibition of both the gastric acid and pepsin secretion.

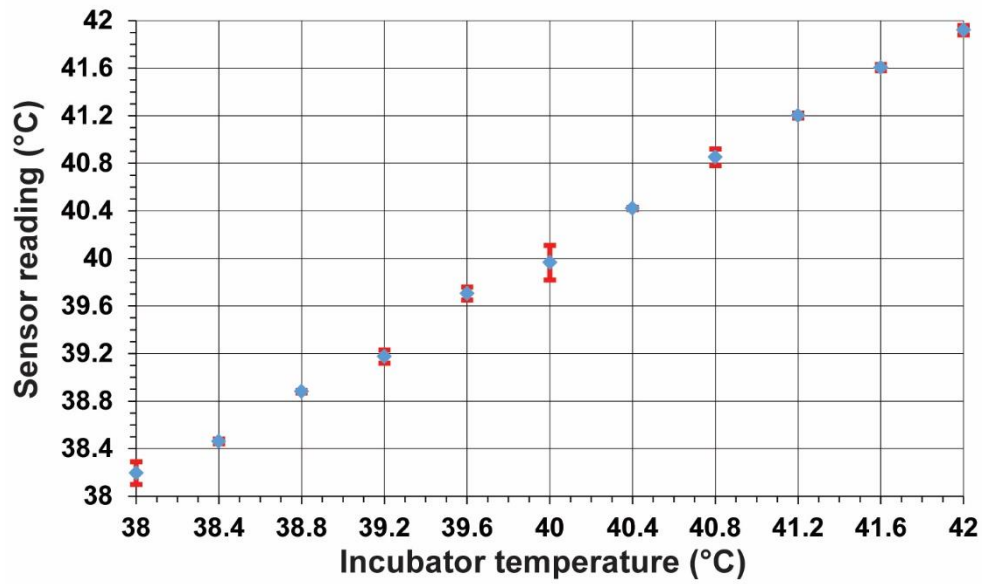

**Figure S2.** The digital reading of the temperature sensor in the gastric gas profiler vs the actual environmental chamber temperature.

## Reference

- 1 Jensen, B. B. & Jorgensen, H. Effect of dietary fiber on microbial activity and microbial gas production in various regions of the gastrointestinal tract of pigs. *Appl. Environ. Microbiol.* **60**, 1897-1904, (1994).
